# Supplementary material for: Opioid Prescribing and Suicide Risk in the United States
Source: Atypon-hosted journal article supplement (doi:10.1176/appi.ajp.22020102), 2023-04-11

Data supplement for Olfson et al., Opioid Prescribing and Suicide Risk in the United States. Am J Psychiatry (doi: 10.1176/appi.ajp.22020102)

| TABLE S1. Mean rates of opioid prescribing and opioid-related deaths total and by sex in 886 commuting zones, 2009 and 2017 |                                 |                                 |                       |                                 |                                 |                      |                                 |                                 |                        |
|-----------------------------------------------------------------------------------------------------------------------------|---------------------------------|---------------------------------|-----------------------|---------------------------------|---------------------------------|----------------------|---------------------------------|---------------------------------|------------------------|
|                                                                                                                             | Total                           |                                 |                       | Males                           |                                 |                      | Females                         |                                 |                        |
| Opioid Prescribing                                                                                                          | 2009 Mean Rate per 100          | 2017 Mean Rate per 100          | Difference (95% CI)   | 2009 Mean Rate per 100          | 2017 Mean Rate per 100          | Difference (95% CI)  | 2009 Mean Rate per 100          | 2017 Mean Rate per 100          | Difference (95% CI)    |
| Opioid prescriptions per capita                                                                                             | 70.19                           | 61.63                           | -8.56 (-10.67, -6.45) | 58.22                           | 52.28                           | -5.93 (-7.73, -4.14) | 81.96                           | 70.77                           | -11.20 (-13.64, -8.75) |
| Percent with an opioid prescription                                                                                         | 26.40                           | 20.27                           | -6.12 (-6.70, -5.54)  | 22.60                           | 17.58                           | -5.01 (-5.52, -4.51) | 30.13                           | 22.90                           | -7.23 (-7.89, -6.57)   |
| Percent with high-dose prescription                                                                                         | 2.01                            | 1.60                            | -0.42 (-0.49, -0.34)  | 1.73                            | 1.45                            | -0.28 (-0.36, -0.21) | 2.29                            | 1.74                            | -0.55 (-0.63, -0.46)   |
| Percent with long-term prescription                                                                                         | 1.24                            | 0.96                            | -0.28 (-0.33, -0.23)  | 0.83                            | 0.64                            | -0.19 (-0.23, -0.16) | 1.65                            | 1.28                            | -0.37 (-0.44, -0.31)   |
| Percent with ≥3 prescribers                                                                                                 | 3.18                            | 2.26                            | -0.92 (-1.02, -0.83)  | 2.50                            | 1.84                            | -0.66 (-0.74, -0.59) | 3.85                            | 2.67                            | -1.18 (-1.30, -1.06)   |
| Mortality <sup>A</sup>                                                                                                      | 2009 Rate per 100,000 Person-Yr | 2017 Rate per 100,000 Person-Yr | Difference (95% CI)   | 2009 Rate per 100,000 Person-Yr | 2017 Rate per 100,000 Person-Yr | Difference (95% CI)  | 2009 Rate per 100,000 Person-Yr | 2017 Rate per 100,000 Person-Yr | Difference (95% CI)    |
| Suicide, total                                                                                                              | 13.80                           | 16.36                           | 2.56 (2.05, 3.07)     | 21.82                           | 25.63                           | 3.82 (2.99, 4.64)    | 5.91                            | 7.29                            | 1.38 (1.09, 1.68)      |
| Suicide, opioid-related                                                                                                     | 0.64                            | 0.66                            | 0.02 (-0.04, 0.08)    | 0.62                            | 0.58                            | -0.04 (-0.10, 0.03)  | 0.67                            | 0.74                            | 0.07 (-0.004, 0.15)    |
| Unintentional, opioid-related                                                                                               | 6.56                            | 15.62                           | 9.05 (8.18, 9.92)     | 8.81                            | 21.87                           | 13.05 (11.80, 14.30) | 4.35                            | 9.50                            | 5.15 (4.59, 5.71)      |
| Undetermined, opioid-related                                                                                                | 0.73                            | 0.93                            | 0.20 (-0.14, 0.54)    | 0.87                            | 1.22                            | 0.35 (-0.15, 0.85)   | 0.58                            | 0.64                            | 0.57 (-0.13, 0.25)     |

<sup>A</sup> Deaths with underlying ICD-10-CM cause of total suicide (X60-X84, Y87.0, U03) with opioid-related deaths defined as X40-44 (unintentional), X60-64 (suicide), or Y10-Y14 (undetermined) and including opioids (T40.0-T40.4, T40.6). Opioid prescribing and mortality results are weighted to commuting zone population. Data from US Census Bureau and IQVIA Real World Prescription Data 2009-2017.

TABLE S2. Mean rates of opioid prescribing and opioid-related deaths by age group in 886 commuting zones, 2009 and 2017

|                                     | 10-24 Years                        |                                    |                      | 25-44 Years                        |                                    |                         | 45-64 Years                        |                                    |                      | 65+ Years                          |                                    |                       |
|-------------------------------------|------------------------------------|------------------------------------|----------------------|------------------------------------|------------------------------------|-------------------------|------------------------------------|------------------------------------|----------------------|------------------------------------|------------------------------------|-----------------------|
| Opioid Prescribing                  | 2009 Mean Rate per 100             | 2017 Mean Rate per 100             | Difference (95% CI)  | 2009 Mean Rate per 100             | 2017 Mean Rate per 100             | Difference (95% CI)     | 2009 Mean Rate per 100             | 2017 Mean Rate per 100             | Difference (95% CI)  | 2009 Mean Rate per 100             | 2017 Mean Rate per 100             | Difference (95% CI)   |
| Opioid prescriptions per capita     | 19.95                              | 12.29                              | -7.66 (-8.2, -7.11)  | 61.53                              | 42.55                              | -18.98 (-20.84, -17.13) | 96.34                              | 89.46                              | -6.88 (-9.93, -3.84) | 132.64                             | 123.74                             | -8.89 (-12.68, -5.11) |
| Percent with an opioid prescription | 13.80                              | 8.53                               | -5.27 (-5.61, -4.93) | 25.88                              | 18.23                              | -7.65 (-8.25, -7.05)    | 29.64                              | 23.36                              | -6.29 (-6.94, -5.63) | 46.29                              | 37.13                              | -9.16 (-10.12, -8.19) |
| Percent with high-dose prescription | 0.09                               | 0.03                               | -0.06 (-0.06, -0.06) | 1.30                               | 0.73                               | -0.57 (-0.62, -0.52)    | 3.29                               | 2.73                               | -0.57 (-0.69, -0.44) | 4.71                               | 3.59                               | -1.12 (-1.28, -0.96)  |
| Percent with long-term prescription | 0.07                               | 0.02                               | -0.04 (-0.05, -0.04) | 0.84                               | 0.45                               | -0.39 (-0.43, -0.35)    | 1.92                               | 1.48                               | -0.43 (-0.51, -0.36) | 3.12                               | 2.49                               | -0.63 (-0.74, -0.52)  |
| Percent with ≥3 prescribers         | 0.84                               | 0.27                               | -0.57 (-0.6, -0.54)  | 3.26                               | 1.73                               | -1.54 (-1.65, -1.43)    | 4.15                               | 3.18                               | -0.97 (-1.1, -0.84)  | 5.37                               | 4.64                               | -0.72 (-0.88, -0.56)  |
| Mortality <sup>A</sup>              | 2009 Mean Rate per 100,000 Pers-Yr | 2017 Mean Rate per 100,000 Pers-Yr | Difference (95% CI)  | 2009 Mean Rate per 100,000 Pers-Yr | 2017 Mean Rate per 100,000 Pers-Yr | Difference (95% CI)     | 2009 Mean Rate per 100,000 Pers-Yr | 2017 Mean Rate per 100,000 Pers-Yr | Difference (95% CI)  | 2009 Mean Rate per 100,000 Pers-Yr | 2017 Mean Rate per 100,000 Pers-Yr | Difference (95% CI)   |
| Suicide, total                      | 7.28                               | 10.48                              | 3.21 (2.67, 3.75)    | 14.44                              | 17.73                              | 3.29 (2.56, 4.01)       | 18.16                              | 19.62                              | 1.46 (0.75, 2.17)    | 14.32                              | 16.00                              | 1.69 (0.89, 2.48)     |
| Suicide, opioid-related             | 0.12                               | 0.17                               | 0.05 (0.003, 0.09)   | 0.63                               | 0.51                               | -0.12 (-0.20, -0.04)    | 1.15                               | 1.13                               | -0.02 (-0.15, 0.10)  | 0.43                               | 0.79                               | 0.36 (0.24, 0.48)     |
| Unintentional, opioid-related       | 3.08                               | 5.91                               | 2.82 (2.47, 3.17)    | 9.35                               | 26.28                              | 16.93 (15.27, 18.59)    | 8.50                               | 18.17                              | 9.67 (8.63, 10.72)   | 1.02                               | 2.91                               | 1.89 (1.66, 2.13)     |
| Undetermined, opioid-related        | 0.31                               | 0.30                               | -0.01 (-0.13, 0.11)  | 0.92                               | 1.37                               | 0.46 (-0.06, 0.98)      | 1.06                               | 1.26                               | 0.20 (-0.26, 0.67)   | 0.20                               | 0.28                               | 0.09 (-0.01, 0.18)    |

<sup>A</sup> Deaths with underlying ICD-10-CM cause of total suicide (X60-X84, Y87.0, U03) with opioid-related deaths defined as X40-44 (unintentional), X60-64 (suicide), or Y10-Y14 (undetermined) and including opioids (T40.0-T40.4, T40.6). Pers-Yr denotes Person-Years. Opioid prescribing and mortality results are weighted to commuting zone population. Data from US Census Bureau and IQVIA Real World Prescription Data 2009-2017.

TABLE S3. Associations of regional change in opioid prescriptions per capita with all suicide deaths and with suicide deaths involving opioids

|                               | <b>All Deaths by Suicide</b>                       |      |         |       |         |      |         |       |                                                 |              |           |               |            |              |
|-------------------------------|----------------------------------------------------|------|---------|-------|---------|------|---------|-------|-------------------------------------------------|--------------|-----------|---------------|------------|--------------|
|                               | US Geographic Regions                              |      |         |       |         |      |         |       | Tests of Equality Between Regional Coefficients |              |           |               |            |              |
| Opioid Metric                 | East                                               |      | South   |       | Midwest |      | West    |       | East South                                      | East Midwest | East West | South Midwest | South West | Midwest West |
|                               | $\beta$                                            | $p$  | $\beta$ | $p$   | $\beta$ | $p$  | $\beta$ | $p$   | $p$                                             | $p$          | $p$       | $p$           | $p$        | $p$          |
| Prescription per capita       | -.008                                              | .732 | .048    | <.001 | .022    | .009 | .087    | <.001 | .012                                            | .183         | <.001     | .011          | .032       | <.001        |
| Percent $\geq 1$ prescription | .030                                               | .041 | .072    | <.001 | .026    | .014 | .143    | <.001 | .002                                            | .797         | <.001     | <.001         | .003       | <.001        |
| Percent high dose             | .016                                               | .072 | .020    | .001  | .025    | .002 | .053    | <.001 | .711                                            | .450         | .018      | .610          | .030       | .083         |
| Percent long-term             | -.028                                              | .339 | .028    | <.001 | .027    | .001 | .058    | <.001 | .051                                            | .052         | .002      | .899          | .025       | .027         |
| Percent multiple prescriber   | .017                                               | .047 | .049    | <.001 | .009    | .225 | .114    | <.001 | .002                                            | .407         | <.001     | <.001         | <.001      | <.001        |
|                               | <b>Deaths by Suicide involving Opioid Overdose</b> |      |         |       |         |      |         |       |                                                 |              |           |               |            |              |
| Prescription per capita       | .028                                               | .153 | .035    | <.001 | .020    | .046 | .084    | <.001 | .739                                            | .706         | .024      | .207          | .005       | <.001        |
| Percent $\geq 1$ prescription | .001                                               | .973 | .038    | <.001 | .020    | .093 | .098    | <.001 | .089                                            | .397         | <.001     | .219          | <.001      | <.001        |
| Percent high dose             | .036                                               | .028 | .023    | <.001 | .023    | .027 | .070    | <.001 | .424                                            | .489         | .116      | .949          | .002       | .007         |
| Percent long-term             | .038                                               | .158 | .027    | <.001 | .022    | .042 | .098    | <.001 | .695                                            | .572         | .058      | .681          | <.001      | <.001        |
| Percent multiple prescriber   | .014                                               | .390 | .034    | <.001 | .026    | .005 | .122    | <.001 | .251                                            | .493         | <.001     | .490          | <.001      | <.001        |

Deaths with underlying ICD-10-CM all causes of suicide (X40-X84, Y87.0, U03) above and intentional overdose (X60-X64) also involving opioids (T40.0-T40.4, T40.6) below.

FIGURE S1. Opioid prescriptions per capita by quintiles in 882 commuting zones, United States 2009 and 2017

2009

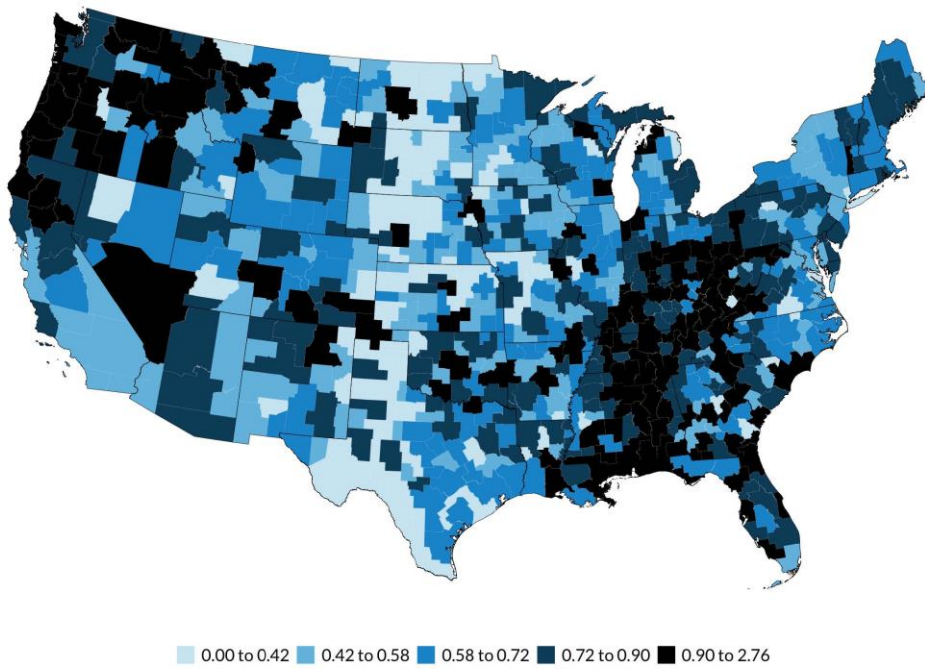

2017

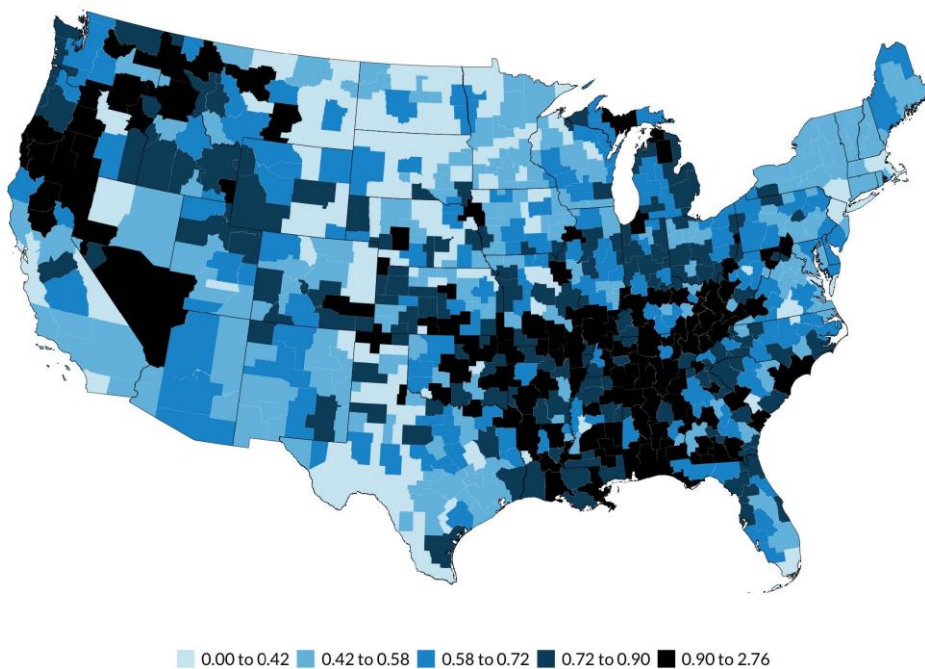

FIGURE S2. Percent with an opioid prescription by quintiles in 882 commuting zones, United States 2009 and 2017

2009

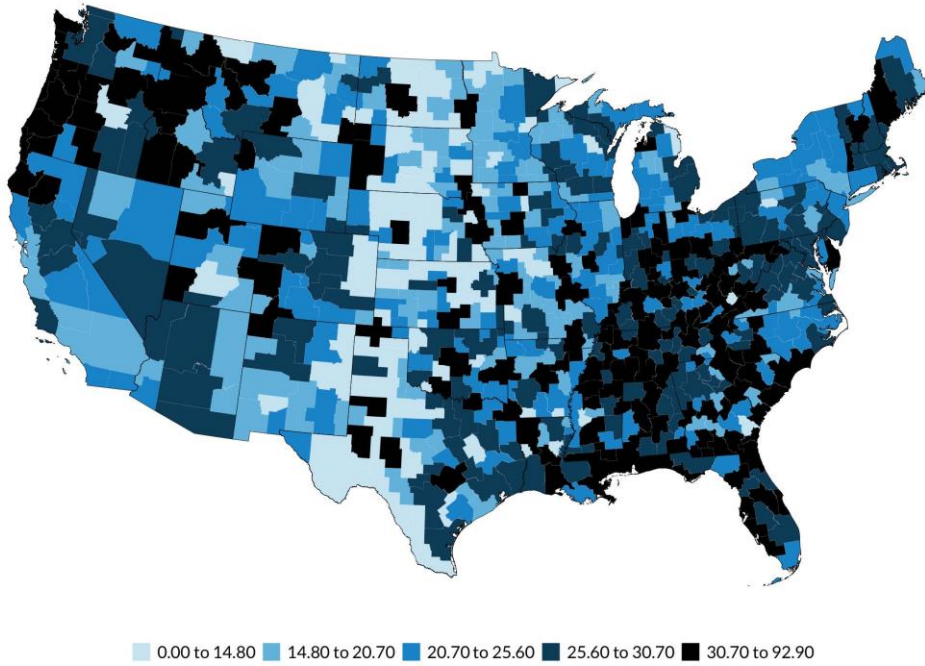

2017

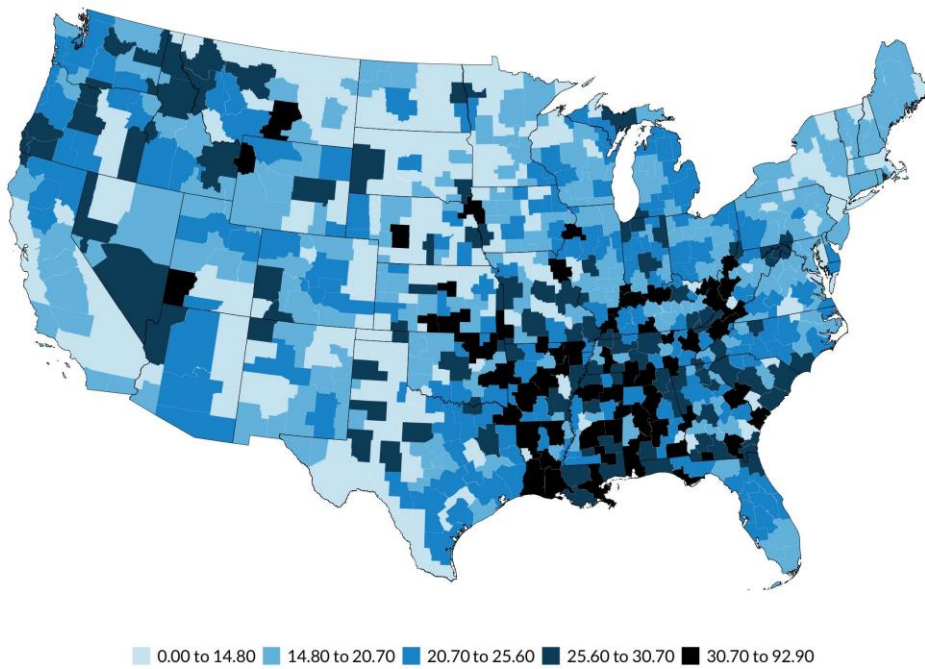

FIGURE S3. Percent with high-dose opioid prescription by quintiles in 882 commuting zones, United States 2009 and 2017

2009

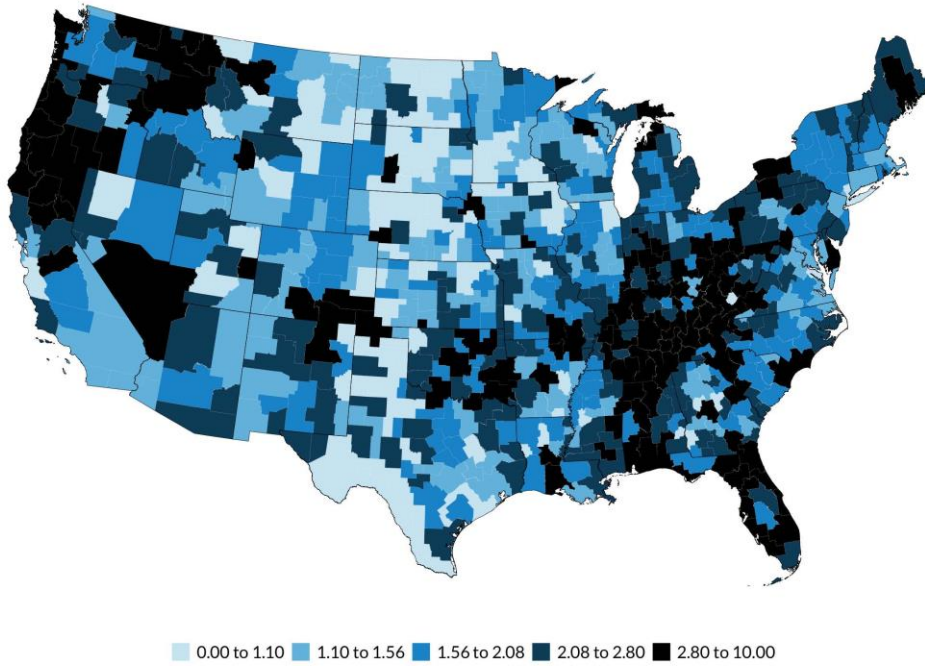

2017

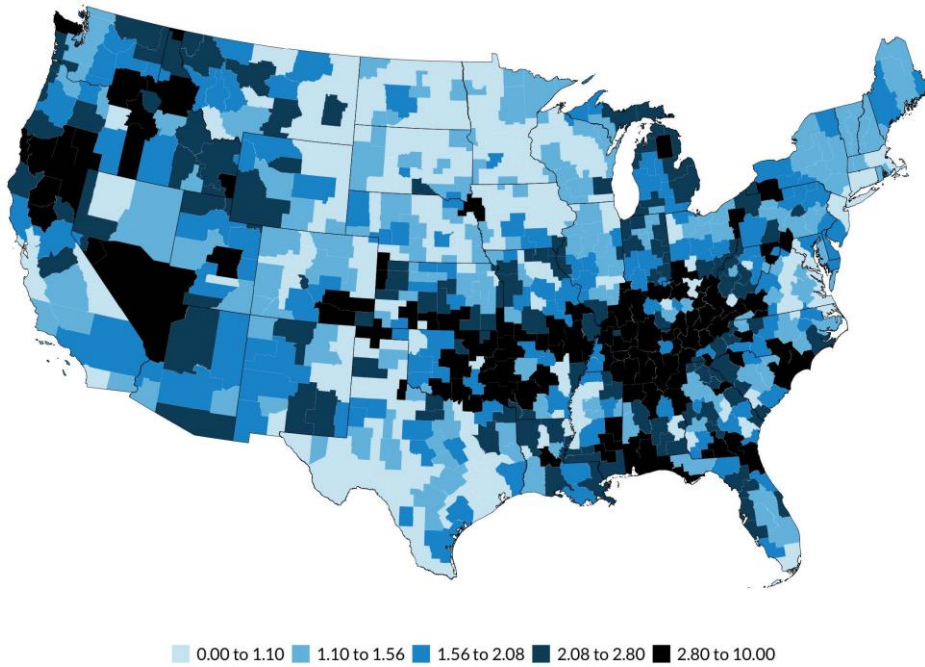

FIGURE S4. Scatterplot of the change in opioid prescriptions per capita and change in the rate of suicide deaths per 100,000 persons in 886 commuting zones, United States 2009 to 2017

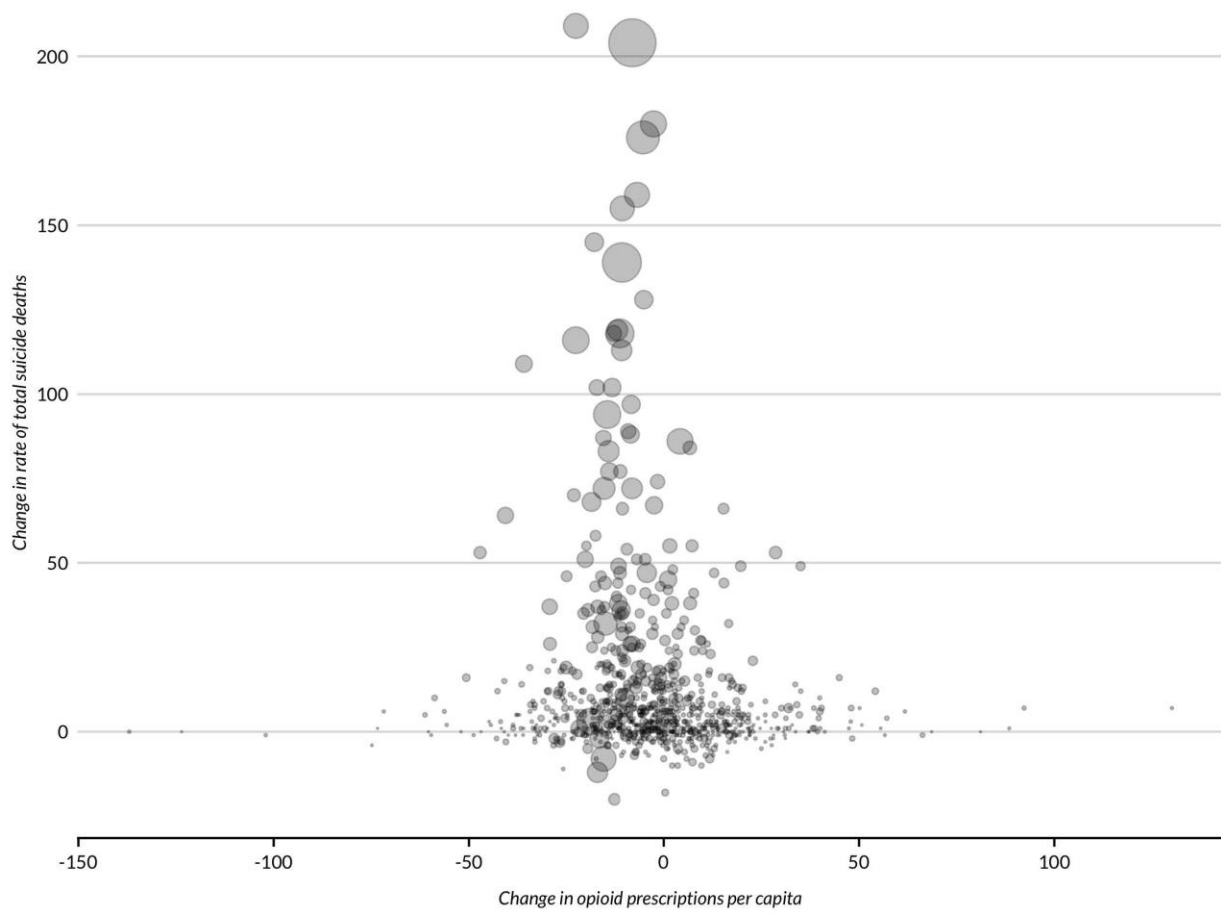



FIGURE S5. Scatterplot of the change in opioid prescriptions per capita and change in the rate of suicide deaths involving opioids per 100,000 persons in 886 commuting zones, United States 2009 to 2017

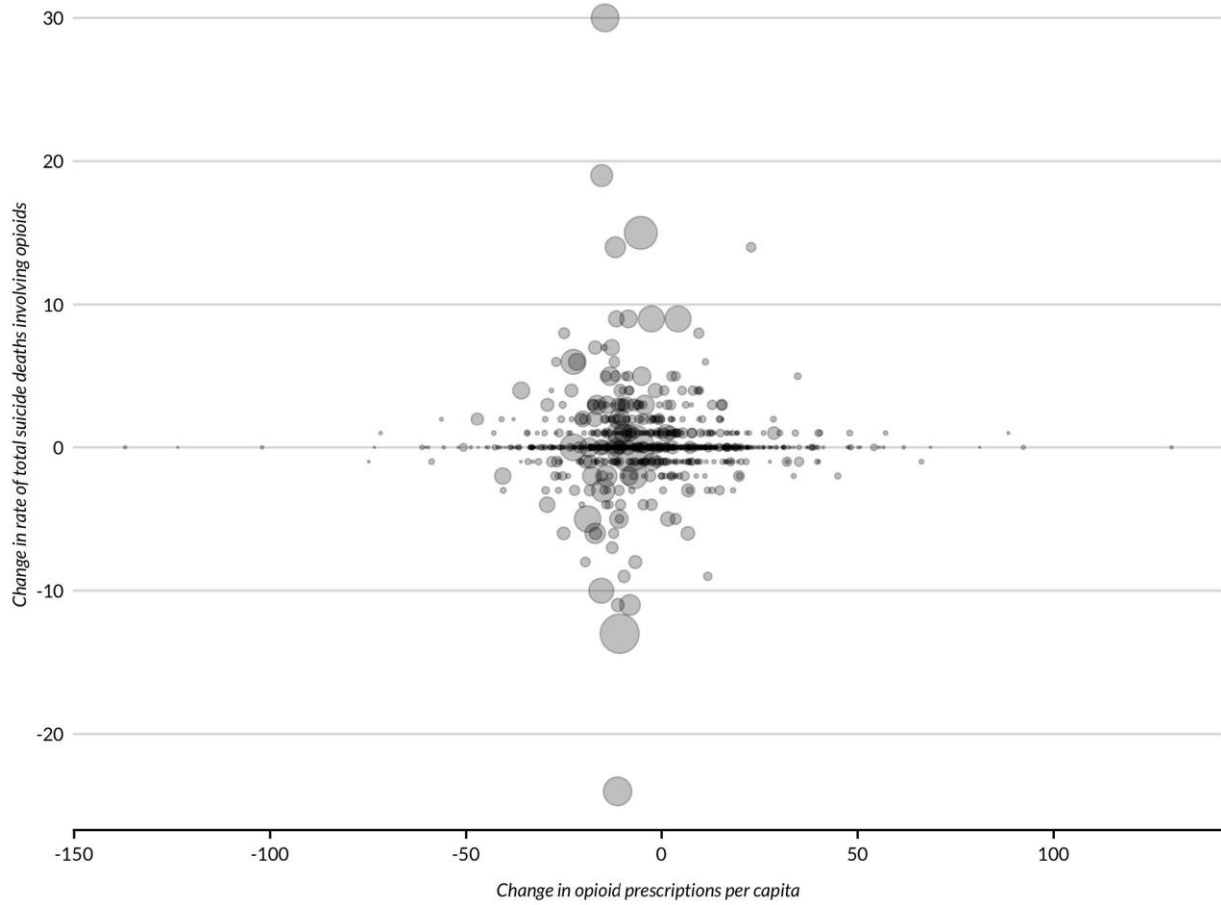

Supplement: appi.ajp.22020102.ds001.pdf [file appi.ajp.22020102.ds001.pdf]
